# Supplementary material for: Vertical profiles of cloud condensation nuclei number concentration and its empirical estimate from aerosol optical properties over the North China Plain
Source: Copernicus journal article supplement (doi:10.5194/acp-22-14879-2022), 2022-11-23
Supplement: Supplementary file 1 [file acp-22-14879-2022-supplement.pdf]

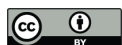

*Supplement of*

## **Vertical profiles of cloud condensation nuclei number concentration and its empirical estimate from aerosol optical properties over the North China Plain**

**Rui Zhang et al.**

*Correspondence to:* Yuying Wang (yuyingwang@nuist.edu.cn)

The copyright of individual parts of the supplement might differ from the article licence.

**Table S1.** The fitting results of Eq. (1) for the 11 level flights

| Flight code | Altitude (km) | $C$   | $k$  | $R^2$ |
|-------------|---------------|-------|------|-------|
| RF1_a       | 3.6           | 156   | 0.18 | 0.59  |
| RF2_a       | 0.4           | 3029  | 1.71 | 0.94  |
| RF2_b       | 3.6           | 2317  | 0.86 | 0.88  |
| RF2_c       | 0.4           | 6560  | 1.75 | 0.92  |
| RF6_a       | 2.5           | 282   | 0.46 | 0.91  |
| RF6_b       | 1.1           | 9981  | 0.79 | 0.83  |
| RF7_a       | 3.1           | 391   | 0.62 | 0.95  |
| RF7_b       | 0.4           | 3218  | 0.65 | 0.73  |
| RF7_c       | 1.8           | 828   | 0.37 | 0.91  |
| RF8_a       | 0.6           | 8120  | 0.89 | 0.91  |
| RF11_a      | 0.7           | 10310 | 0.97 | 0.96  |

### ***Sampling method***

The sampling device is above the front of the airplane cabin, which is not affected by the propeller after the plane takes off. The sampling flow was iso-kinetic. As described in Wang et al. (2018), the conical double diffuser aerosol inlet, designed for a Twin Otter, is installed on the Y-12. This inlet system is manufactured by Droplet Measurements Technologies (MP-1806-A and MP-1807-A, Boulder, CO, USA) (Hegg et al., 2005). The passing efficiency is expected to be near 100% for particle diameters up to 2.5  $\mu\text{m}$  and near 50% for particles between 3 and 4  $\mu\text{m}$  (Huebert et al., 2004; McNaughton et al., 2007). The typical cruising speed of aircraft is 60-70  $\text{m s}^{-1}$ , with ascent/descent rates of 2–5  $\text{m s}^{-1}$ . Ascents and descents are gentle to avoid turbulence taking about 20 min to ascend 3000 m or  $\sim 150$  m/min. The ram heating is considered by adjusting the measured air temperature and relative humidity:

$$\text{Temp\_adj} = (\text{Temp} + 273.15) / (1 + 0.2 * \text{Rf} * \text{M}^2) - 273.15,$$

where,

Temp\_adj – adjusted air temperature by taking the ram heating effect into account

Temp – measured air temperature ( $^{\circ}\text{C}$ )

Rf – recovery factor (rf = 0.896445604404384)

M – mach number, which is calculated from the measured true air speed and calculated speed of sound:

$$\text{M} = \text{Airspeed\_True} / \text{Speed\_sound}$$

$$\text{Speed\_sound} = 331.3 * \text{sqrt}((\text{Temp} + 273.15) / 273.15)$$

Relative humidity is also adjusted by multiplying the ratio of saturated water pressures under measured and adjusted air temperature:

$$\text{RH\_adj} = \text{RH} * (\text{svpt} / \text{svpat});$$

where,

$$\text{svpt} = 6.1121 * \exp((18.678 - \text{Temp} / 234.5) * (\text{Temp} / (257.14 + \text{Temp})));$$

$$\text{svpat} = 6.1121 * \exp((18.678 - \text{Temp\_adj} / 234.5) * (\text{Temp\_adj} / (257.14 + \text{Temp\_adj})));$$

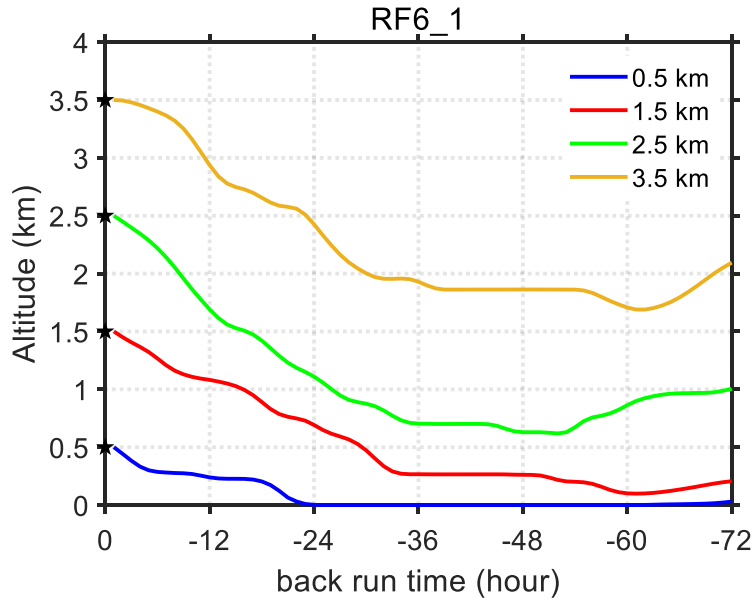

**Figure S1.** Seventy-two-hour HYSPLIT back trajectories in southeasterly air masses at 0.5, 1.5, 2.5, and 3.5 km starting altitudes (showing RF6\_1 as the example).

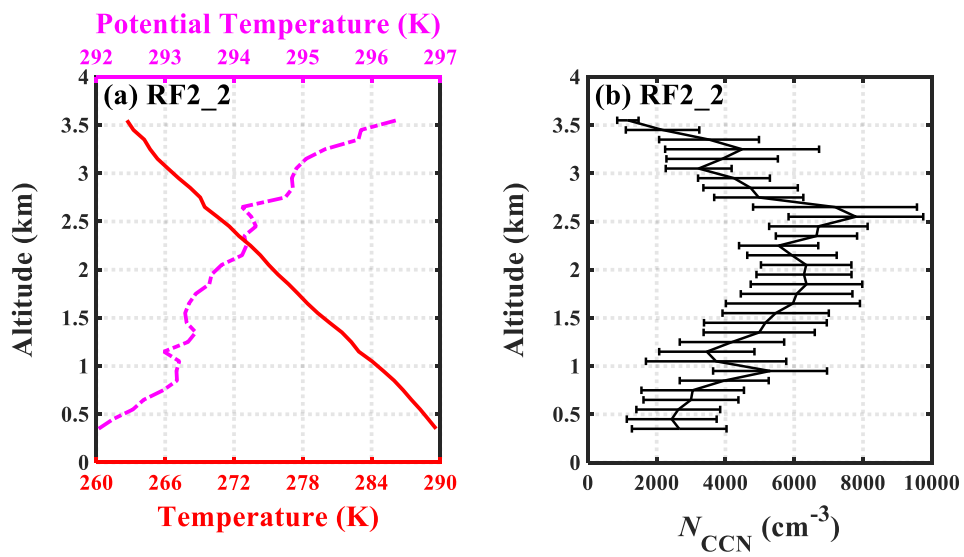

**Figure S2.** Same as Fig. 3 but for RF2\_2  $N_{CCN}$  profile with no TIL.

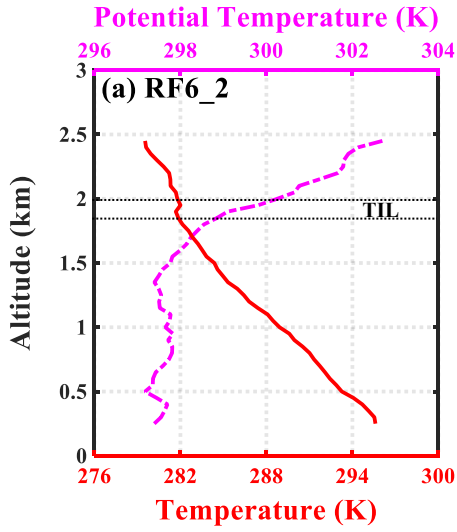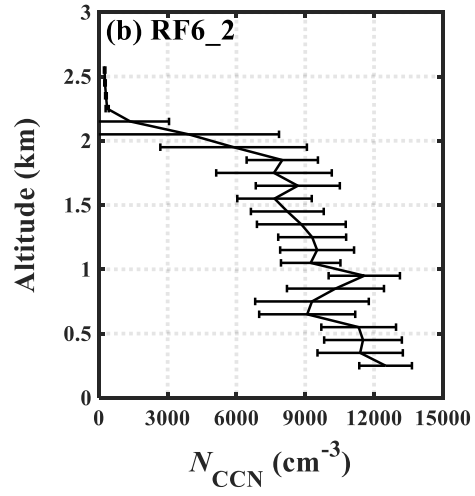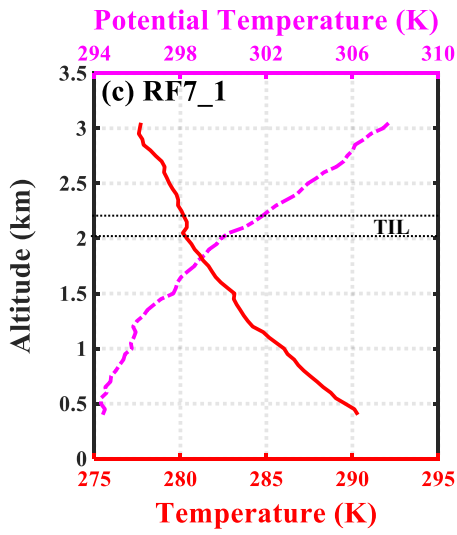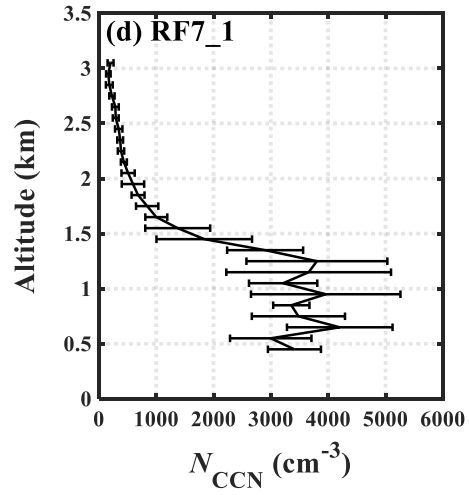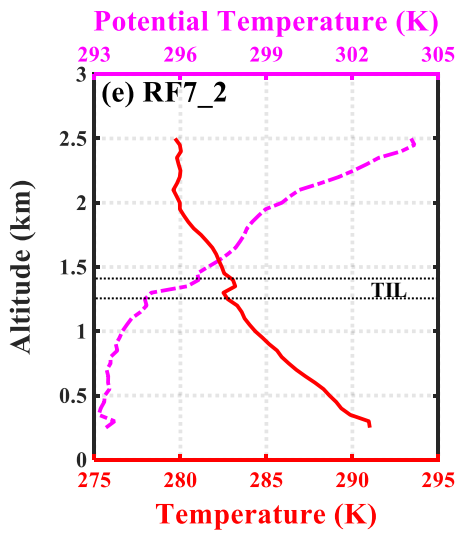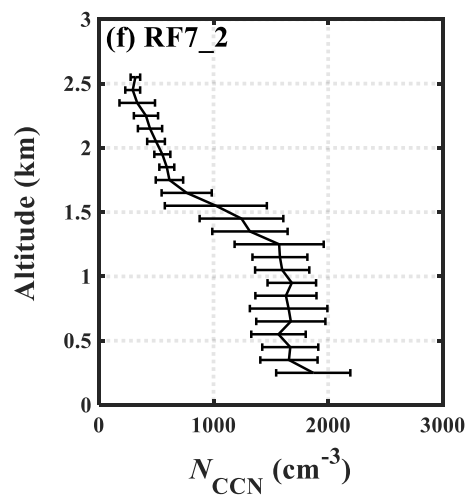

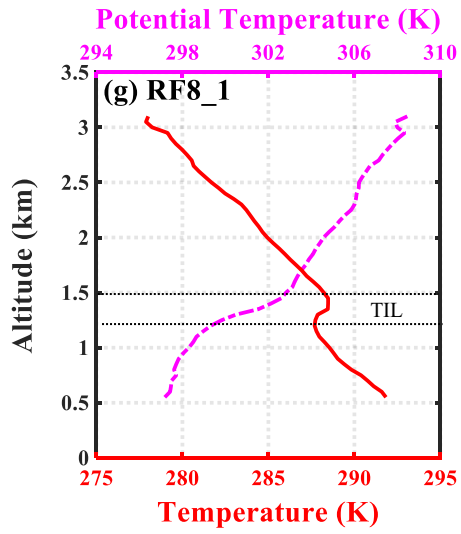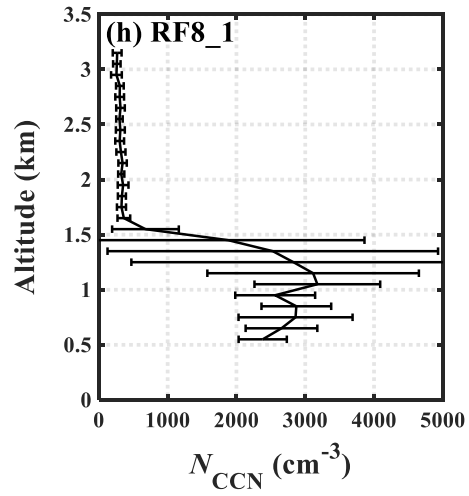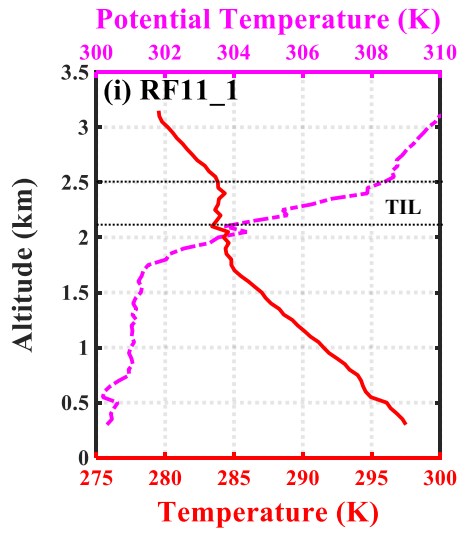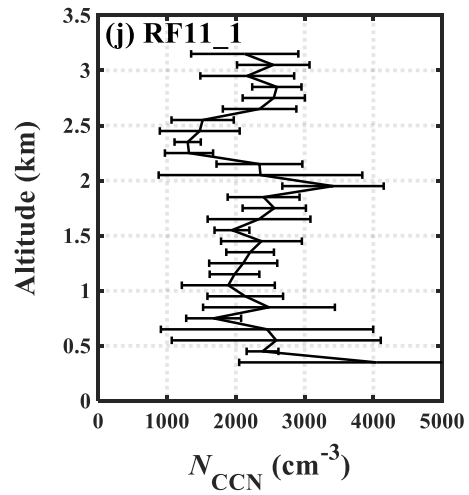

**Figure S3.** Same as Fig.3 but for RF6\_2, RF7\_1, RF7\_2, RF8\_1, and RF11\_1  $N_{CCN}$  profiles with one TIL.

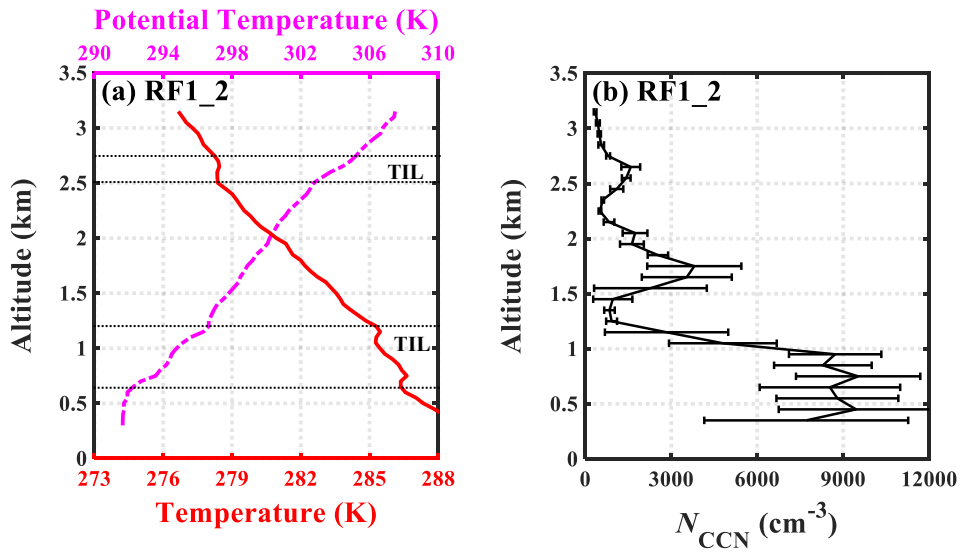

**Figure S4.** Same as Fig.3 but for RF1\_2  $N_{CCN}$  profiles with dual TIL.

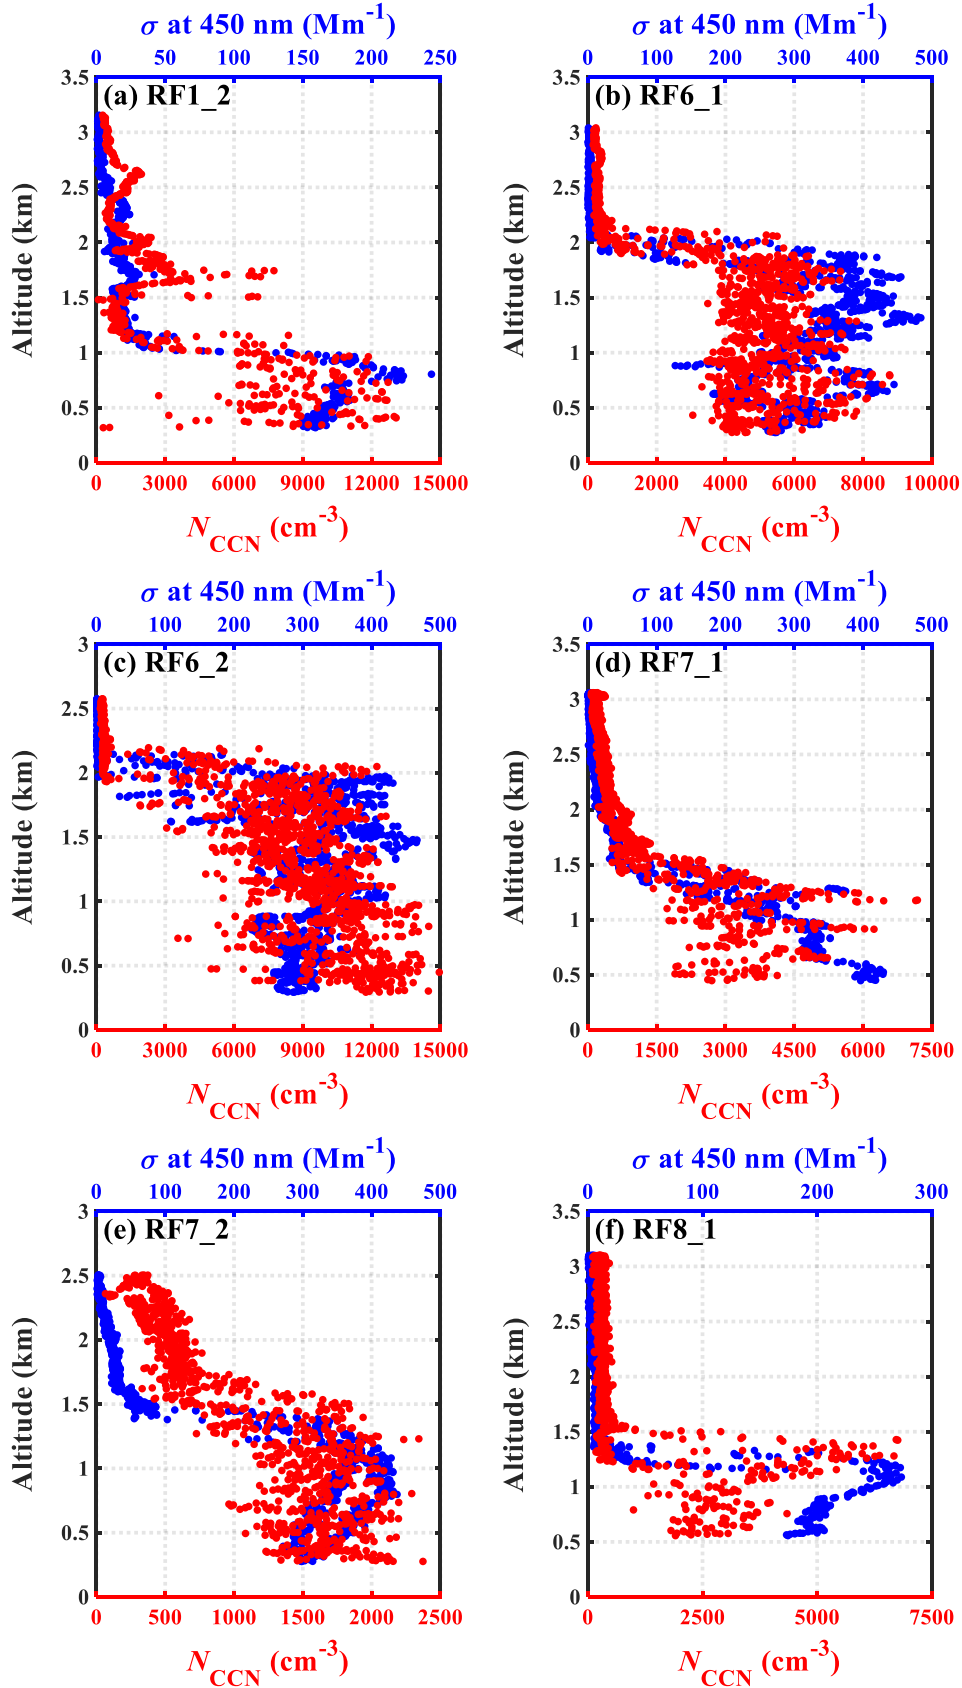

**Figure S5.** Same as Fig. 6b but in (a) RF1\_2, (b) RF6\_1, (c) RF6\_2, (d) RF7\_1, (e) RF7\_2, and (f) RF8\_1 vertical spiral flight.

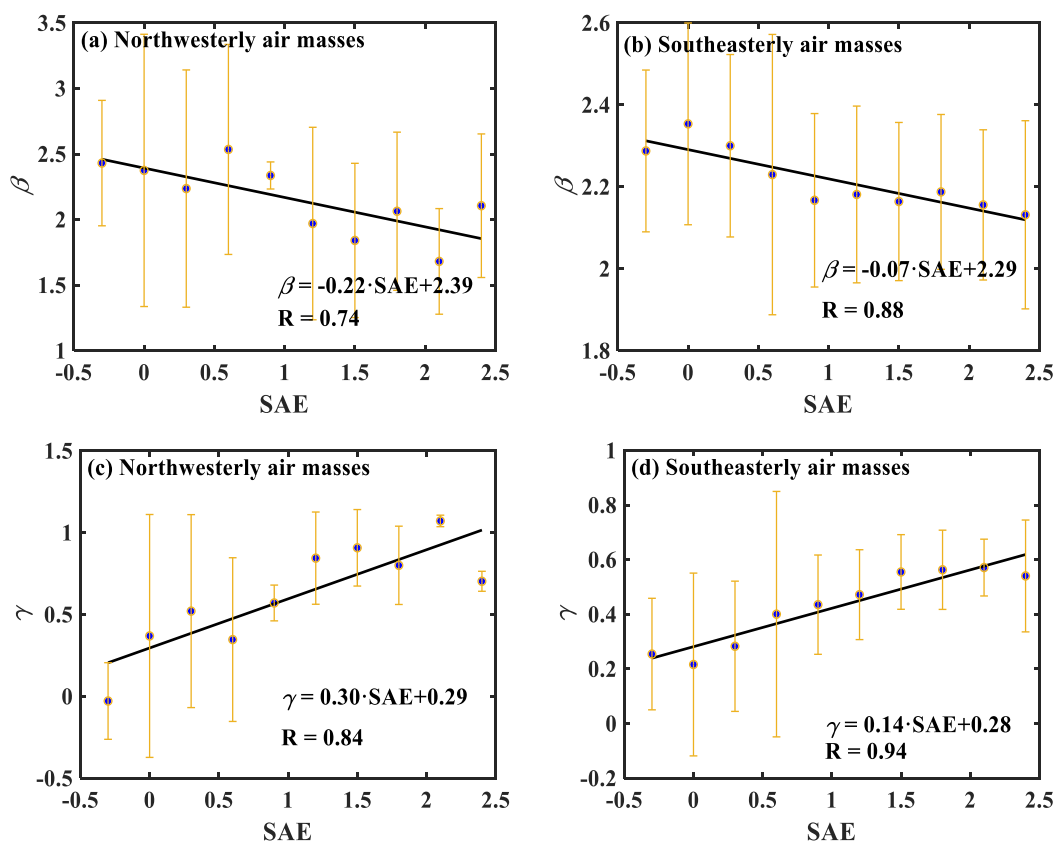

**Figure S6.** The two fitting parameters  $\beta$  and  $\gamma$  as a function of the aerosol scattering Ångström exponent (SAE) in northwesterly air masses (a and c) and southeasterly air masses (b and d). The dots are mean values averaged in 0.3-wide SAE bins. The black lines are best-fit lines from linear regression. Linear relations and correlation coefficients are given in each panel. The yellow error bars denote standard deviations.

#### Reference:

- Hegg, D. A., Covert, D. S., Jonsson, H., and Covert, P. A.: Determination of the transmission efficiency of an aircraft aerosol inlet, *Aerosol Sci. Technol.*, 39, 966–971, <https://doi.org/10.1080/02786820500377814>, 2005.
- Huebert, B., Bertram, T., Kline, J., Howell, S., Eatough, D., and Blomquist, B.: Measurements of organic and elemental carbon in Asian outflow during ACE-Asia from the NSF/NCAR C-130, *J. Geophys. Res.-Atmos.*, 109, D19S11, <https://doi.org/10.1029/2004JD004700>, 2004.
- McNaughton, C. S., Clarke, A. D., Howell, S. G., Pinkerton, M., Anderson, B., Thornhill, L., Hudgins, C., Winstead, E., Dibb, J. E., and Scheuer, E.: Results from the DC-8 Inlet Characterization Experiment (DICE): Airborne versus surface sampling of mineral dust and sea salt aerosols, *Aerosol Sci. Technol.*, 41, 136–159, <https://doi.org/10.1080/02786820601118406>, 2007.
- Wang, F., Li, Z., Ren, X., Jiang, Q., He, H., Dickerson, R. R., Dong, X., and Lv, F.: Vertical distributions of aerosol optical properties during the spring 2016 ARIAs airborne campaign in the North China Plain, *Atmos. Chem. Phys.*, 18, 8995–9010, <https://doi.org/10.5194/acp-18-8995-2018>, 2018.
